# Supplementary material for: N-Glycan structures and N-glycosylation sites of mouse soluble intercellular adhesion molecule-1 revealed by MALDI-TOF and FTICR mass spectrometry
Source: Oxford University Press journal article supplement (doi:10.1093/glycob/cwl032), 2006-07-28
Supplement: cwl032_Supplementary_Data.zip [file cwl032_Supplementary_Data.zip]

# Supplementary mass spectrometric data to Figure 2

| Fraction No. | [M-H] <sup>-</sup> <sub>obs</sub> | [M-H] <sup>-</sup> <sub>calc</sub> | Adduct     | Assignment                                                                                  |
|--------------|-----------------------------------|------------------------------------|------------|---------------------------------------------------------------------------------------------|
| 1            | <b>1508</b>                       | <b>1508</b>                        | <b>DHB</b> | <b>Hex<sub>5</sub>HexNAc<sub>2</sub></b>                                                    |
|              | 1670                              | 1670                               | DHB        | Hex <sub>6</sub> HexNAc <sub>2</sub>                                                        |
|              | 1735                              | 1736                               | DHB        | Fuc <sub>1</sub> Hex <sub>3</sub> HexNAc <sub>4</sub>                                       |
|              | 1831                              | 1832                               | DHB        | Hex <sub>7</sub> HexNAc <sub>2</sub>                                                        |
|              | 1898                              | 1898                               | DHB        | Fuc <sub>1</sub> Hex <sub>4</sub> HexNAc <sub>4</sub>                                       |
|              | 1915                              | 1914                               | DHB        | Hex <sub>5</sub> HexNAc <sub>4</sub>                                                        |
|              | 1994                              | 1994                               | DHB        | Hex <sub>8</sub> HexNAc <sub>2</sub>                                                        |
|              | 2061                              | 2060                               | DHB        | Fuc <sub>1</sub> Hex <sub>5</sub> HexNAc <sub>4</sub>                                       |
|              | 2280                              | 2279                               | DHB        | Hex <sub>6</sub> HexNAc <sub>5</sub>                                                        |
|              | 2426                              | 2425                               | DHB        | Fuc <sub>1</sub> Hex <sub>6</sub> HexNAc <sub>5</sub>                                       |
|              | 2636                              | 2636                               |            | Fuc <sub>1</sub> Hex <sub>7</sub> HexNAc <sub>6</sub>                                       |
|              | 3156                              | 3155                               | DHB        | Fuc <sub>1</sub> Hex <sub>8</sub> HexNAc <sub>7</sub>                                       |
| 2            | 2050                              | 2051                               |            | NeuAc <sub>1</sub> Hex <sub>5</sub> HexNAc <sub>4</sub>                                     |
|              | <b>2196</b>                       | <b>2197</b>                        |            | <b>NeuAc<sub>1</sub>Fuc<sub>1</sub>Hex<sub>5</sub>HexNAc<sub>4</sub> *</b>                  |
|              | 2212                              | 2213                               |            | NeuGc <sub>1</sub> Fuc <sub>1</sub> Hex <sub>5</sub> HexNAc <sub>4</sub>                    |
|              | 2416                              | 2416                               |            | NeuAc <sub>1</sub> Hex <sub>6</sub> HexNAc <sub>5</sub>                                     |
|              | 2562                              | 2562                               |            | NeuAc <sub>1</sub> Fuc <sub>1</sub> Hex <sub>6</sub> HexNAc <sub>5</sub>                    |
|              | 2577                              | 2578                               |            | NeuGc <sub>1</sub> Fuc <sub>1</sub> Hex <sub>6</sub> HexNAc <sub>5</sub>                    |
|              | 2781                              | 2781                               |            | NeuAc <sub>1</sub> Hex <sub>7</sub> HexNAc <sub>6</sub>                                     |
|              | 2927                              | 2927                               |            | NeuAc <sub>1</sub> Fuc <sub>1</sub> Hex <sub>7</sub> HexNAc <sub>6</sub>                    |
|              | 2944                              | 2943                               |            | NeuGc <sub>1</sub> Fuc <sub>1</sub> Hex <sub>7</sub> HexNAc <sub>6</sub>                    |
|              | 3292                              | 3292                               |            | NeuAc <sub>1</sub> Fuc <sub>1</sub> Hex <sub>8</sub> HexNAc <sub>7</sub>                    |
| 3            | 2927                              | 2927                               |            | NeuAc <sub>1</sub> Fuc <sub>1</sub> Hex <sub>7</sub> HexNAc <sub>6</sub>                    |
|              | 3072                              | 3072                               |            | NeuAc <sub>2</sub> Hex <sub>7</sub> HexNAc <sub>6</sub>                                     |
|              | <b>3218</b>                       | <b>3218</b>                        |            | <b>NeuAc<sub>2</sub>Fuc<sub>1</sub>Hex<sub>7</sub>HexNAc<sub>6</sub> *</b>                  |
|              | 3234                              | 3234                               |            | NeuAc <sub>1</sub> NeuGc <sub>1</sub> Fuc <sub>1</sub> Hex <sub>7</sub> HexNAc <sub>6</sub> |
|              | 3583                              | 3583                               |            | NeuAc <sub>2</sub> Fuc <sub>1</sub> Hex <sub>8</sub> HexNAc <sub>7</sub>                    |
| 4            | 1595                              | 1596                               |            | Phos <sub>1</sub> Hex <sub>6</sub> HexNAc <sub>2</sub> *                                    |
|              | 2050                              | 2051                               |            | NeuAc <sub>1</sub> Hex <sub>5</sub> HexNAc <sub>4</sub>                                     |
|              | 2342                              | 2342                               |            | NeuAc <sub>2</sub> Hex <sub>5</sub> HexNAc <sub>4</sub> *                                   |
|              | 2416                              | 2416                               |            | NeuAc <sub>1</sub> Hex <sub>6</sub> HexNAc <sub>5</sub>                                     |
|              | 2488                              | 2488                               |            | NeuAc <sub>2</sub> Fuc <sub>1</sub> Hex <sub>5</sub> HexNAc <sub>4</sub> *                  |
|              | 2504                              | 2504                               |            | NeuAc <sub>1</sub> NeuGc <sub>1</sub> Fuc <sub>1</sub> Hex <sub>5</sub> HexNAc <sub>4</sub> |
|              | <b>2707</b>                       | <b>2707</b>                        |            | <b>NeuAc<sub>2</sub>Hex<sub>6</sub>HexNAc<sub>5</sub> *</b>                                 |
|              | 2853                              | 2853                               |            | NeuAc <sub>2</sub> Fuc <sub>1</sub> Hex <sub>6</sub> HexNAc <sub>5</sub>                    |
|              | 2869                              | 2869                               |            | NeuGc <sub>1</sub> NeuAc <sub>1</sub> Fuc <sub>1</sub> Hex <sub>6</sub> HexNAc <sub>5</sub> |
|              | 3072                              | 3072                               |            | NeuAc <sub>2</sub> Hex <sub>7</sub> HexNAc <sub>6</sub>                                     |
|              | 3218                              | 3218                               |            | NeuAc <sub>2</sub> Fuc <sub>1</sub> Hex <sub>7</sub> HexNAc <sub>6</sub> *                  |
|              |                                   |                                    |            |                                                                                             |
| 5            | 3584                              | 3583                               |            | NeuAc <sub>2</sub> Fuc <sub>1</sub> Hex <sub>8</sub> HexNAc <sub>7</sub>                    |
|              | 3729                              | 3728                               |            | NeuAc <sub>3</sub> Hex <sub>8</sub> HexNAc <sub>7</sub>                                     |
|              | <b>3875</b>                       | <b>3874</b>                        |            | <b>NeuAc<sub>3</sub>Fuc<sub>1</sub>Hex<sub>8</sub>HexNAc<sub>7</sub> *</b>                  |
|              | 3891                              | 3890                               |            | NeuGc <sub>1</sub> NeuAc <sub>2</sub> Fuc <sub>1</sub> Hex <sub>8</sub> HexNAc <sub>7</sub> |
| 6            | 3218                              | 3218                               |            | NeuAc <sub>2</sub> Fuc <sub>1</sub> Hex <sub>7</sub> HexNAc <sub>6</sub>                    |
|              | 3363                              | 3363                               |            | NeuAc <sub>3</sub> Hex <sub>7</sub> HexNAc <sub>6</sub>                                     |
|              | <b>3509</b>                       | <b>3509</b>                        |            | <b>NeuAc<sub>3</sub>Fuc<sub>1</sub>Hex<sub>7</sub>HexNAc<sub>6</sub> *</b>                  |
|              | 3526                              | 3525                               |            | NeuGc <sub>1</sub> NeuAc <sub>2</sub> Fuc <sub>1</sub> Hex <sub>7</sub> HexNAc <sub>6</sub> |
| 7            | 2707                              | 2707                               |            | NeuAc <sub>2</sub> Hex <sub>6</sub> HexNAc <sub>5</sub>                                     |
|              | <b>2999</b>                       | <b>2998</b>                        |            | <b>NeuAc<sub>3</sub>Hex<sub>6</sub>HexNAc<sub>5</sub> *</b>                                 |
|              | 3145                              | 3144                               |            | NeuAc <sub>3</sub> Fuc <sub>1</sub> Hex <sub>6</sub> HexNAc <sub>5</sub>                    |
| 8            | <b>2633</b>                       | <b>2633</b>                        |            | <b>NeuAc<sub>3</sub>Hex<sub>5</sub>HexNAc<sub>4</sub></b>                                   |
|              | 2998                              | 2998                               |            | NeuAc <sub>3</sub> Hex <sub>6</sub> HexNAc <sub>5</sub>                                     |
|              | 4531                              | 4531                               |            | NeuAc <sub>4</sub> Fuc <sub>1</sub> Hex <sub>9</sub> HexNAc <sub>8</sub>                    |
| 9            | 3000                              | 2998                               |            | NeuAc <sub>3</sub> Hex <sub>6</sub> HexNAc <sub>5</sub>                                     |
|              | <b>4166</b>                       | <b>4166</b>                        |            | <b>NeuAc<sub>4</sub>Fuc<sub>1</sub>Hex<sub>8</sub>HexNAc<sub>7</sub> *</b>                  |
| 10           | 3510                              | 3509                               |            | NeuAc <sub>3</sub> Fuc <sub>1</sub> Hex <sub>7</sub> HexNAc <sub>6</sub>                    |
|              | 3654                              | 3654                               |            | NeuAc <sub>4</sub> Hex <sub>7</sub> HexNAc <sub>6</sub>                                     |
|              | <b>3800</b>                       | <b>3800</b>                        |            | <b>NeuAc<sub>4</sub>Fuc<sub>1</sub>Hex<sub>7</sub>HexNAc<sub>6</sub> *</b>                  |
|              | 3816                              | 3816                               |            | NeuGc <sub>1</sub> NeuAc <sub>3</sub> Fuc <sub>1</sub> Hex <sub>7</sub> HexNAc <sub>6</sub> |
| 11           | 2998                              | 2998                               |            | NeuAc <sub>3</sub> Hex <sub>6</sub> HexNAc <sub>5</sub>                                     |
|              | <b>3289</b>                       | <b>3289</b>                        |            | <b>NeuAc<sub>4</sub>Hex<sub>6</sub>HexNAc<sub>5</sub> *</b>                                 |
|              | 3306                              | 3305                               |            | NeuGc <sub>1</sub> NeuAc <sub>3</sub> Hex <sub>6</sub> HexNAc <sub>5</sub>                  |

The peak fractions 1-11 collected from the ion exchange chromatography of 2-aminobenzamide-labeled N-glycans shown in **Fig. 2A** were analyzed by MALDI-TOF MS in negative polarity linear mode. The assignment of glycan compositions is based on comparison of the observed monoisotopic masses  $[M-H]^-_{\text{obs}}$  with monoisotopic masses calculated from N-linked oligosaccharide structures commonly found on glycoproteins expressed in wild-type Chinese hamster ovary cells ( $[M-H]^-_{\text{calc}}$ ; NeuAc, N-acetylneuraminic acid; NeuGc, N-glycolylneuraminic acid; Fuc, fucose; Hex, hexose; HexNAc, N-acetylhexosamine). The major glycan species present in each peak fraction as revealed by MALDI-TOF MS (which are schematically shown in **Fig. 2B**) are highlighted by bold letters and asterisks designate glycans whose number of terminal negatively charged substituents was confirmed by MALDI-TOF/TOF tandem mass spectrometry. Most of the neutral N-glycans contained in fraction No. 1 were found as negatively charged, non-covalent matrix (2,5-dihydrobenzoic acid; DHB) adducts of the type  $[M+DHB-H]^-$  as frequently observed for neutral oligosaccharides composed of more than four monosaccharides with underivatized OH groups (Mele and Malpezzi, 2000).

Mele, A. and Malpezzi, L. (2000) Noncovalent association phenomena of 2,5-dihydroxybenzoic acid with cyclic and linear oligosaccharides. A matrix-assisted laser desorption/ionization time-of-flight mass spectrometric and X-ray crystallographic study. *J Am Soc Mass Spectrom*, **11**, 228-236.
